# Supplementary material for: Porcine transcriptome analysis based on 97 non-normalized cDNA libraries and assembly of 1,021,891 expressed sequence tags
Source: PubMed Central journal article supplement (PMC1895994; doi:10.1186/gb-2007-8-4-r45), 2007-04-02
Supplement: gb-2007-8-4-r45-S1.pdf [file gb-2007-8-4-r45-S1.pdf]

# Supplementary material:

## Porcine transcriptome analysis based on 97 non-normalized cDNA libraries and assembly of 1,021,891 ESTs

Jan Gorodkin<sup>1</sup>, Susanna Cirera<sup>1</sup>, Jakob Hedegaard<sup>2</sup>, Michael J. Gilchrist<sup>3</sup>, Frank Panitz<sup>2</sup>, Claus B. Jørgensen<sup>1</sup>, Karsten Scheibye-Knudsen<sup>1</sup>, Troels Arvin<sup>1</sup>, Steen Lumholdt<sup>1</sup>, Milena Sawera<sup>1</sup>, Trine Green<sup>1</sup>, Bente J. Nielsen<sup>1</sup>, Jakob H. Havgaard<sup>1</sup>, Carina Rosenkilde<sup>1</sup>, Jun Wang<sup>4,5,6</sup>, Heng Li<sup>4,5</sup>, Ruiqiang Li<sup>4,6</sup>, Bin Liu<sup>4</sup>, Songnian Hu<sup>4</sup>, Wei Dong<sup>4</sup>, Wei Li<sup>4</sup>, Jun Yu<sup>4</sup>, Jian Wang<sup>4</sup>, Hans-Henrik Stærfeldt<sup>7</sup>, Rasmus Wernersson<sup>7</sup>, Lone B. Madsen<sup>2</sup>, B. Thomsen<sup>2</sup>, Henrik Hornshøj<sup>2</sup>, B. Zahn<sup>2</sup>, X. Wang<sup>2</sup>, Lars Bolund<sup>4,5</sup>, Søren Brunak<sup>7</sup>, Huanming Yang<sup>4</sup>, Christian Bendixen<sup>2</sup> Merete Fredholm<sup>1\*</sup>

<sup>1</sup>Division of Genetics and Bioinformatics, IBHV The Royal Veterinary and Agricultural University, DK-1870 Frederiksberg C, Denmark

<sup>2</sup> Department of Genetics and Biotechnology, Danish Institute of Agricultural Sciences, DK-8830 Tjele, Denmark

<sup>3</sup> The Wellcome Trust/Cancer Research UK Gurdon Institute, Cambridge, CB2 1QN, UK

<sup>4</sup> Beijing Genomics Institute, Beijing 101300, P.R. China

<sup>5</sup> Institute of Human Genetics, University of Aarhus, DK-8000 Aarhus C, Denmark

<sup>6</sup> Department of Biochemistry and Molecular Biology, University of Southern Denmark, DK-5230 Odense M, Denmark

<sup>7</sup> Center for Biological Sequence Analysis, BioCentrum-DTU, Building 208, DK-2800 Lyngby, Denmark

**January 17, 2007**

Running title: A draft of the porcine transcriptome.

# 1 Cleaning libraries

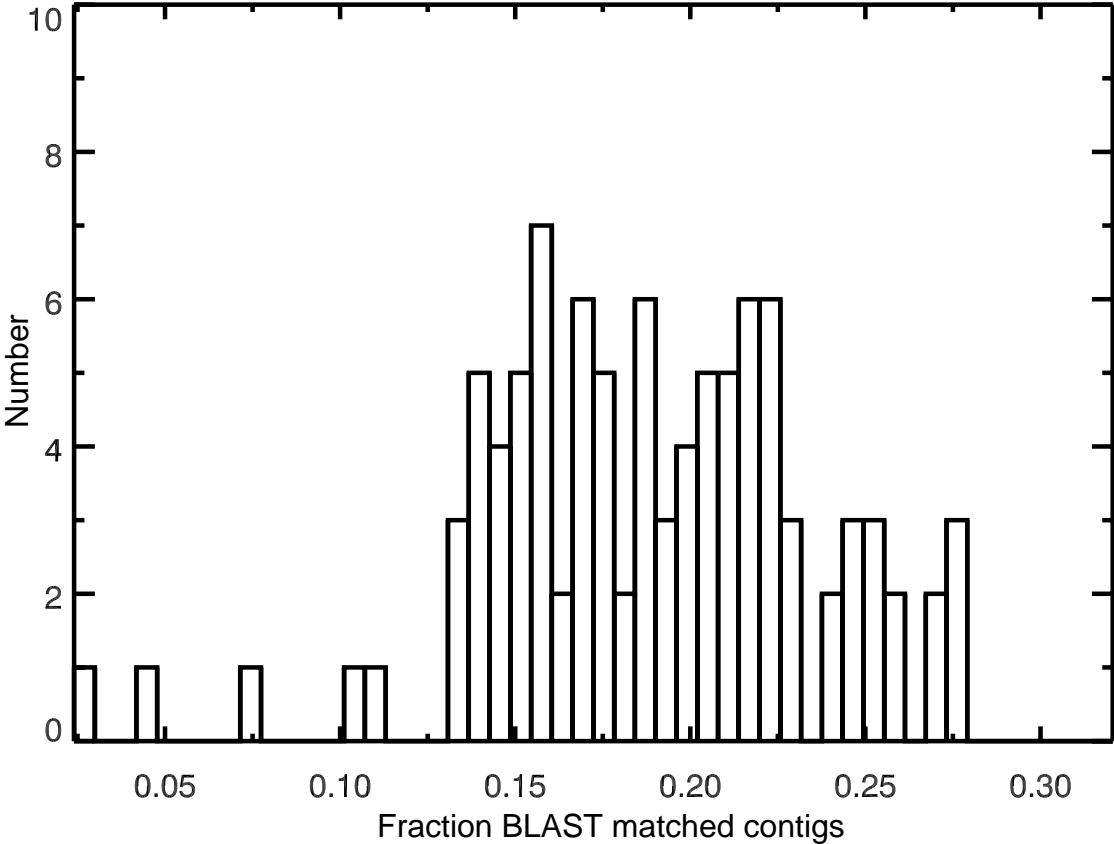

**Figure S1:** The distribution of the fraction of contigs with BLAST match of at least level M3]. There is a tail of fraction less than 12.5 % consisting of the 5 libraries: ctl, cbr, pan, cbl and mgm.

## 2 Patterns of expression correlation

**Figure S2:** Pairwise correlation of expression. (A) An example of correlating (CC: 0.81) expression between two ribosomal proteins homologous to RLA0\_HUMAN and RS23\_HUMAN. Each point in the plot represent a cDNA library and its coordinate the expression values of the two genes for that library. (B) An example of expression correlation (CC: 0.89) between two non-normalized developmental brain cDNA libraries, Fbs (foetus 107 days, brain stem) and Fhi (foetus 107 days, hippocampus). Each point in the plot represent a gene cluster and its coordinate the expression of the that in the two libraries.

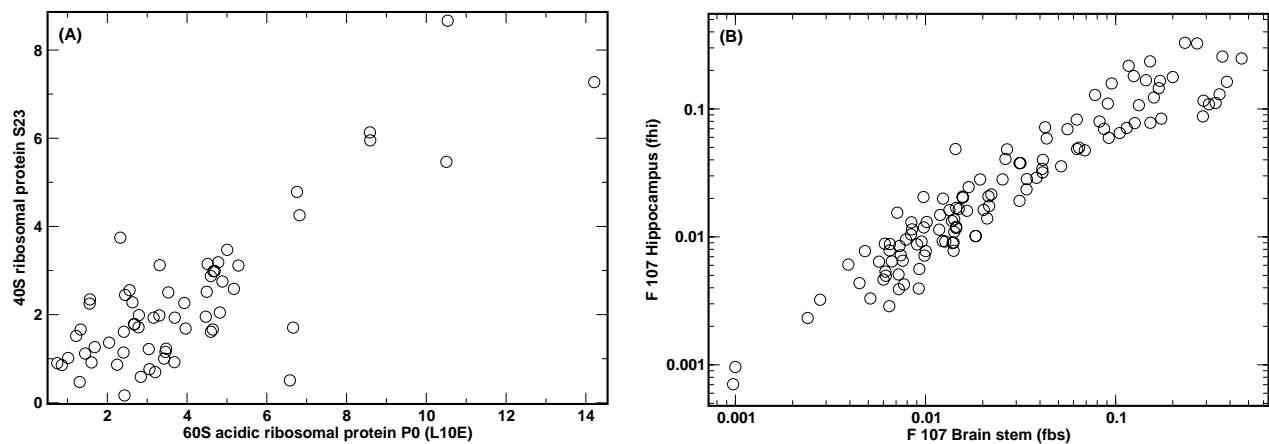

### 3 Patterns of expression correlation

**Figure S3:** An example of correlation between gene ontology categories across the tissues, here between *transcription regulator activity* and *translation regulator activity*. Each point represent the overall proportion of that library representation of the two categories.

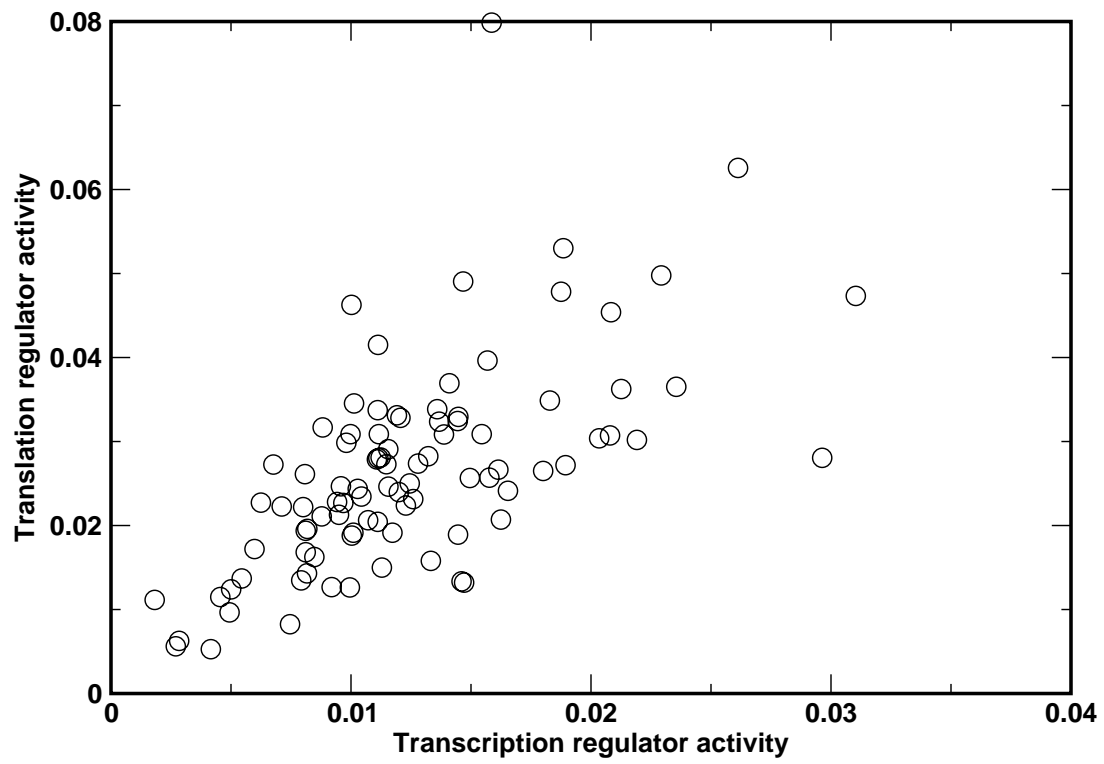

## 4 Non-coding RNA candidates

**Table S1:** The 53 non-coding RNA candidates found by similarity of matches M0 or M1 (see Table 2 in the main text). The column "SD sequence name" indicates the sequence name of the gene-cluster or singleton, "Seq. ID" is the sequence ID from various sources(\*), "Description" provides a short description, "Rfam AC" the Rfam accession name (if available) and "Length" is the sequence length of the subject non-coding RNA from the database. (\*) Names containing a "" are from Rfam, names containing "-mir" from the microRNA registry and names with a "|" originates from fantom or RNAdB. Notes: The following groups of clusters were only counted once for the different reasons: <sup>1,3</sup>: These sequences/clusters were not merged due to lack of overlap beyond the region matching the RNA. <sup>2</sup>: These clusters were the result of phylogenetic decomposition from an original cluster, thus separating the EST from different strains. Furthermore two singletons Tra1-TCH01E100031 and Pig1-2O15 were discarded as the match bacterial RNAs.

| SD sequence name                           | Seq. ID                                                                            | Description                                                    | Rfam AC | Length |
|--------------------------------------------|------------------------------------------------------------------------------------|----------------------------------------------------------------|---------|--------|
| <sup>1</sup> Ss1.1-Pig3-SRG8017G22.5       | X00722.1/165-317                                                                   | 5_8S_rRNA 5.8S ribosomal RNA                                   | RF00002 | 149    |
| <sup>1</sup> Ss1.1-Liv1-LVRM10156E03.5     | X00722.1/165-317                                                                   | 5_8S_rRNA 5.8S ribosomal RNA                                   | RF00002 | 153    |
| Ss1.1-rcad24b_l22.5                        | AC025362.12/104594-104663                                                          | snoZ12 small nucleolar RNA                                     | RF00289 | 67     |
| rpigca_2218.y1                             | AF146043.1/3911-3989                                                               | snoZ37 Small nucleolar RNA                                     | RF00055 | 79     |
| Pig1-121B20                                | AL357314.11/74156-74233                                                            | U45 small nucleolar RNA                                        | RF00279 | 78     |
| Ss1.1-rret20_p23.5                         | AB070559.1/4340-4471<br>gnl combinedlit LIT1477                                    | U72 small nucleolar RNA                                        | RF00139 | 132    |
| Ss1.1-MPL-MPL384_4_A01.5                   | AC112907.7/62238-62107<br>gnl combinedlit LIT1126                                  | E3 small nucleolar RNA                                         | RF00092 | 133    |
| Ss1.1-LyN1-MLN01A050104.5                  | AF532927.1/678-740                                                                 | SECIS Selenocysteine insertion sequence                        | RF00031 | 63     |
| Ss1.1-LyN1-MLN01A060101.5                  | AY358096.1/701-767                                                                 | SECIS Selenocysteine insertion sequence                        | RF00031 | 67     |
| Ss1.1-ruio20_b4.5                          | D88033.1/3186-3249                                                                 | SECIS Selenocysteine insertion sequence                        | RF00031 | 63     |
| Ss1.1-Liv1-LVR010052B09.5                  | L12743.1/694-758                                                                   | SECIS Selenocysteine insertion sequence                        | RF00031 | 65     |
| Ss1.1-recc2834c_f22.5                      | AF380118.1/366-433                                                                 | SECIS Selenocysteine insertion sequence                        | RF00031 | 68     |
| <sup>2</sup> Ss1.1-Tra1-TCH01E080083.5.120 | M11778.1/1726-1789                                                                 | SECIS Selenocysteine insertion sequence                        | RF00031 | 64     |
| <sup>2</sup> Ss1.1-Ova1-OVR010002E09.5.110 | M11778.1/1726-1789                                                                 | SECIS Selenocysteine insertion sequence                        | RF00031 | 64     |
| Bra1-olf_141_F03                           | AK022146.1/1-191                                                                   | U2 spliceosomal RNA                                            | RF00004 | 190    |
| Bra1-olf_091_B07                           | U57614.1/4882-5072                                                                 | U2 spliceosomal RNA                                            | RF00004 | 186    |
| rtes07_n1.y1                               | BX648500.1/2-97                                                                    | U6 spliceosomal RNA                                            | RF00026 | 93     |
| <sup>3</sup> mco1919b_117.y1               | AK127657.1/1-85                                                                    | U6 spliceosomal RNA                                            | RF00026 | 83     |
| <sup>4</sup> Pig1-35H07                    | AK127657.1/1-85                                                                    | U6 spliceosomal RNA                                            | RF00026 | 83     |
| <sup>3</sup> Liv1-LVR01C070083             | AK127657.1/1-85                                                                    | U6 spliceosomal RNA                                            | RF00026 | 81     |
| Plat1-C0000031_K16                         | AC131676.2/83760-83866                                                             | U6 spliceosomal RNA                                            | RF00026 | 107    |
| Ss1.1-Pig4-TMW8034N20.5                    | M31687.1/705-811                                                                   | U6 spliceosomal RNA                                            | RF00026 | 107    |
| Ss1.1-Pig3-SRG8023E21.5                    | AL806519.12/25496-25390                                                            | U6 spliceosomal RNA                                            | RF00026 | 107    |
| reep15c_p11.y1                             | rno-mir-365                                                                        | pre-miRNA                                                      | —       | 86     |
| rplac_6675.y1                              | mmu-mir-425                                                                        | pre-miRNA                                                      | —       | 85     |
| Pig1-58H11                                 | ppa-mir-24-1<br>gnl combinedlit LIT3258<br>AF043896.1/53-120                       | pre-miRNA                                                      | RF00178 | 68     |
| Pig2-36J18                                 | hsa-mir-423                                                                        | pre-miRNA                                                      | —       | 92     |
| Ss1.1-rpigcb_15937.5                       | ssc-mir-145                                                                        | pre-miRNA                                                      | —       | 86     |
| Ss1.1-unkn-MI-P-NA-aea-d-09-1-UM.s1.ab1.3  | ssc-mir-186                                                                        | pre-miRNA                                                      | —       | 82     |
| Ss1.1-Pig4-TMW8022F14.3                    | ssc-mir-214<br>gnl combinedlit LIT3238                                             | pre-miRNA                                                      | —       | 110    |
| Ss1.1-Pig2-80M18.5                         | hsa-mir-137<br>gnl combinedlit LIT2562                                             | pre-miRNA                                                      | —       | 102    |
| Ss1.1-Pig2-138B11.5.5                      | ssc-mir-29c<br>gnl combinedlit LIT2927                                             | pre-miRNA                                                      | —       | 88     |
| Ss1.1-rpld0104_e22.5                       | rno-mir-133a<br>gnl combinedlit LIT2505<br>AC105847.11/187382-187294               | pre-miRNA                                                      | RF00446 | 87     |
| Ss1.1-OvaP-UMC-pputal4-001-a11.3           | hsa-let-7b<br>gnl combinedlit LIT2458<br>AL049853.1/17070-16986                    | pre-miRNA                                                      | RF00027 | 84     |
| rnmm27c_f4.y1                              | AF026006.1/1132-1245                                                               | K_chan_RES Potassium channel RNA editing signal                | RF00485 | 111    |
| Ss1.1-Pig2-65E16.5                         | AC079587.4/53411-53524                                                             | K_chan_RES Potassium channel RNA editing signal                | RF00485 | 109    |
| Ss1.1-Pig3-SRG8005M11.5                    | AC006063.1/55115-55002                                                             | K_chan_RES Potassium channel RNA editing signal                | RF00485 | 114    |
| Ss1.1-Pig2-130P20.5                        | AF493545.1/787-900                                                                 | K_chan_RES Potassium channel RNA editing signal                | RF00485 | 114    |
| Ss1.1-LyN1-MLN01H080062.5.5                | AF258463.1/230-288                                                                 | Antizyme_FSE Antizyme RNA frameshifting stimulation element    | RF00381 | 59     |
| Ss1.1-Pig4-TMW8041104.3                    | AF057297.1/248-303                                                                 | Antizyme_FSE Antizyme RNA frameshifting stimulation element    | RF00381 | 56     |
| Thy1-THY010037H12                          | X96401.1/13-215                                                                    | IRES_mnt Mnt IRES                                              | RF00457 | 199    |
| Ss1.1-rpgl07_c11.5                         | AY196206.1/633-564                                                                 | RNA-OUT RNA-OUT                                                | RF00240 | 70     |
| Ss1.1-Pig3-SRG8020F17.3                    | AF221942.1/106-459                                                                 | Telomerase-vert Vertebrate telomerase RNA                      | RF00024 | 355    |
| Ss1.1-unkn-F_2_A09.5                       | U68481.1/913-1007                                                                  | G-CSF_SLDE G-CSF factor stem-loop destabilising element (SLDE) | RF00183 | 95     |
| Ss1.1-rfat0118_g1.5                        | U70060.1/1239-1321                                                                 | CAESAR ctgf/hcs24 CAESAR                                       | RF00172 | 84     |
| Ss1.1-Spl1-SPL010010E02.5                  | AY600299.1/4-151                                                                   | Spi-1 (PU.1) 5' UTR regulatory element                         | RF00232 | 148    |
| Ovi2-UMC-peov1-003-e07                     | ri 2900060B14 ZX00069H11 122                                                       | —                                                              | —       | 123    |
| Ova2-C0003260_N12                          | ri 2010105B14 ZX00081B13 330                                                       | —                                                              | —       | 324    |
| Ss1.1-Tra1-TCH01E080001.5                  | ri hinj HIV2680                                                                    | —                                                              | —       | 744    |
| Ss1.1-Lng1-LNG010027D07.5                  | gnl overlapseqs ASO2290                                                            | —                                                              | —       | 152    |
| Ss1.1-rft538b_b18.5                        | ri 2700074F11 ZX00160O08 458                                                       | —                                                              | —       | 453    |
| Ss1.1-rste35_j22.5                         | ri 2210404A05 ZX00051N24 201                                                       | —                                                              | —       | 201    |
| Ss1.1-Pey1-15B06.5                         | gnl fantom2 FT21316<br>ri 110058D08 R000018D02 528<br>ri 1500006B23 ZX00050A13 105 | —                                                              | —       | 524    |
| Ss1.1-Pig4-TMW8062O08.5                    | ri 1500006B23 ZX00050A13 105                                                       | —                                                              | —       | 104    |
| Ss1.1-rspc032_g9.5                         | ri 2810470K03 ZX00067H11 224                                                       | —                                                              | —       | 225    |
| Ss1.1-Pig4-TMW8036O13.3                    | ri A730009J10 PX00724L22 429                                                       | —                                                              | —       | 428    |
| Ss1.1-Pig4-TMW8039D24.3                    | ri E430019M05 PX00099H09 851                                                       | —                                                              | —       | 830    |

# 5 House keeping gene candidates

**Table S2:** The gene-clusters (next page) represented in more than 80 libraries. The column "SD sequence name" indicates the sequence name of the gene-cluster, the column "E-level" the average (row) unnormalized expression, which is the expected fraction ( $\times 1000$ ) of that gene in a library, "M-level" is the match level to uniprot and "Description" is the description from the matching sequence in uniprot.

| SD sequence name            | E-level | #Libs | M-level | Description                                                                                                                                                                                                                                                    |
|-----------------------------|---------|-------|---------|----------------------------------------------------------------------------------------------------------------------------------------------------------------------------------------------------------------------------------------------------------------|
| Ss1.1-LyN1-MLN01F050053.5.5 | 15.6678 | 92    | M0      | TCTP_PIG (P61288) Translationally controlled tumor protein (TCTP)                                                                                                                                                                                              |
| Ss1.1-Lng1-LNG010078H09.5.5 | 3.3581  | 92    | M0      | RLA0_HUMAN (P05388) 60S acidic ribosomal protein P0 (L10E)                                                                                                                                                                                                     |
| Ss1.1-Liv1-LVR010102H02.5.5 | 7.7001  | 92    | M0      | Q61P59_HUMAN (Q61P59) Eukaryotic translation elongation factor 1 alpha 1 (MSTP056)                                                                                                                                                                             |
| Ss1.1-Tes1-TES01A020049.5   | 1.6710  | 91    | M0      | Q545X8_MOUSE (Q545X8) Adult male kidney cDNA, RIKEN full-length enriched library, clone:0610010B10 product:ribosomal protein S4, X-linked, full insert sequence (ES cells cDNA, RIKEN full-length enriched library, clone:2410045N08 product:ribosomal protein |
| Ss1.1-rtra07_p8.5.5         | 2.1168  | 91    | M1      | RL6_BOVIN (Q58DQ3) 60S ribosomal protein L6                                                                                                                                                                                                                    |
| Ss1.1-rsug26_p8.5.5         | 2.8581  | 91    | M0      | Q5BLK1_MOUSE (Q5BLK1) Ribosomal protein S6                                                                                                                                                                                                                     |
| Ss1.1-rmcp35c_c12.5         | 3.4855  | 91    | M0      | Q6GMC1_XENLA (Q6GMC1) MGC81889 protein                                                                                                                                                                                                                         |
| Ss1.1-rylg16_g3.5.5         | 6.2989  | 91    | M0      | Q6ZWX2_MOUSE (Q6ZWX2) Mus musculus ES cells cDNA, RIKEN full-length enriched library, clone:2410042N11 product:thymosin, beta 4, X chromosome, full insert sequence (Thymosin, beta 4, X chromosome)                                                           |
| Ss1.1-LyN1-MLN01E070009.5.5 | 1.7872  | 91    | M0      | Q9H3F4_HUMAN (Q9H3F4) MSTP030 (Ribosomal protein L5)                                                                                                                                                                                                           |
| Ss1.1-Utr1-UTR010031E07.5   | 1.9760  | 90    | M0      | PTMA_BOVIN (P01252) Prothymosin alpha                                                                                                                                                                                                                          |
| Ss1.1-rspc005_k12.5.5       | 1.4393  | 90    | M0      | Q14433_HUMAN (Q14433) Guanine nucleotide-binding protein G-s-alpha-3; NCBI gi: 386745 (OT-THUMP0000064258) (Fragment)                                                                                                                                          |
| Ss1.1-rpgl23_j16.5.5        | 1.9881  | 90    | M0      | Q6PHZ1_MOUSE (Q6PHZ1) Rpl17 protein                                                                                                                                                                                                                            |
| Ss1.1-rfat0140_c19.5        | 3.0357  | 90    | M0      | Q53Z07_HUMAN (Q53Z07) Ribosomal protein L9 isoform (NPC-A-16)                                                                                                                                                                                                  |
| Ss1.1-rpgl25_m6.5.5         | 1.3753  | 89    | M0      | Q5E983_BOVIN (Q5E983) Eukaryotic translation elongation factor 1 beta 2                                                                                                                                                                                        |
| Ss1.1-rrej35b_g5.5.5        | 2.5156  | 89    | M0      | Q642L0_MOUSE (Q642L0) Ribosomal protein S24, isoform 1                                                                                                                                                                                                         |
| Ss1.1-rebs14c_l6.5          | 2.1297  | 89    | M0      | Q5VVD0_HUMAN (Q5VVD0) Ribosomal protein L11                                                                                                                                                                                                                    |
| Ss1.1-rnco1922b_f18.5       | 1.3337  | 88    | M0      | Q61AX2_HUMAN (Q61AX2) RPL21 protein (Ribosomal protein L21)                                                                                                                                                                                                    |
| Ss1.1-rrej40b_g8.5.5        | 3.2764  | 88    | M0      | Q91YK6_MOUSE (Q91YK6) Rpl23a protein (Fragment)                                                                                                                                                                                                                |
| Ss1.1-rebs30c_o18.5.5       | 1.6066  | 88    | M0      | Q63ZV8_RAT (Q63ZV8) Ribosomal protein L32                                                                                                                                                                                                                      |
| Ss1.1-Lng1-LNG010013F05.5   | 1.1753  | 88    | M0      | Q6PI79_XENLA (Q6PI79) MGC52708 protein (MGC78769 protein) (H3f3b-prov protein) (H3f3a-prov protein) (MGC81913 protein)                                                                                                                                         |
| Ss1.1-Lng1-LNG010002A09.5   | 1.8477  | 88    | M2      | Q59GY2_HUMAN (Q59GY2) Ribosomal protein L4 variant (Fragment)                                                                                                                                                                                                  |
| Ss1.1-Liv1-LVR010055D02.5   | 1.2714  | 88    | M0      | Q5RA83_PONPY (Q5RA83) Hypothetical protein DKFZp459D1928                                                                                                                                                                                                       |
| Ss1.1-Utr1-UTR010020F01.5.5 | 3.9889  | 87    | M0      | B2MG_PIG (Q07717) Beta-2-microglobulin precursor (Lactollin)                                                                                                                                                                                                   |
| Ss1.1-Tra1-TCH01A030070.5   | 1.4871  | 87    | M0      | Q52N47_PIG (Q52N47) Integral membrane protein 2B                                                                                                                                                                                                               |
| Ss1.1-rint31c_g18.5.5       | 3.3976  | 87    | M0      | Q6ZWZ6_MOUSE (Q6ZWZ6) Mus musculus adult male kidney cDNA, RIKEN full-length enriched library, clone:0610039M20 product:ribosomal protein S12, full insert sequence (Ribosomal protein S12) (Mus musculus adult male small intestine cDNA, RIKEN full-length e |
| Ss1.1-reru05c_o5.5          | 2.4411  | 87    | M0      | Q5BLK2_MOUSE (Q5BLK2) Ribosomal protein S20                                                                                                                                                                                                                    |
| Ss1.1-reje04b_g3.5          | 1.2151  | 87    | M0      | Q5M8Q0_MOUSE (Q5M8Q0) Ribosomal protein L15                                                                                                                                                                                                                    |
| Ss1.1-LyN1-MLN01H080062.5.5 | 1.0986  | 87    | M1      | Q29176_PIG (Q29176) Ornithine decarboxylase antizyme (Fragment)                                                                                                                                                                                                |
| Ss1.1-LyN1-MLN01F090002.5   | 1.0447  | 87    | M0      | Q6PI79_XENLA (Q6PI79) MGC52708 protein (MGC78769 protein) (H3f3b-prov protein) (H3f3a-prov protein) (MGC81913 protein)                                                                                                                                         |
| Ss1.1-Tra1-TCH01H100090.5.5 | 1.6565  | 86    | M0      | Q61NP3_XENLA (Q61NP3) Hypothetical protein                                                                                                                                                                                                                     |
| Ss1.1-Tra1-TCH01D040102.5.5 | 2.7785  | 86    | M0      | TBAK_HUMAN (P68363) Tubulin alpha-ubiquitous chain (Alpha-tubulin ubiquitous) (Tubulin K-alpha-1)                                                                                                                                                              |
| Ss1.1-rspl17_f22.5          | 2.6075  | 86    | M0      | Q56JY9_BOVIN (Q56JY9) Ribosomal protein S3a                                                                                                                                                                                                                    |
| Ss1.1-rmed33c_f21.5         | 3.1659  | 86    | M0      | Q5E958_BOVIN (Q5E958) Ribosomal protein S8                                                                                                                                                                                                                     |
| Ss1.1-rhiv33b_e8.5.5        | 0.9905  | 86    | M0      | Q95282_PIG (Q95282) ATP synthase subunit 9, mitochondrial (Fragment)                                                                                                                                                                                           |
| Ss1.1-Utr1-UTR010044D06.5   | 2.2164  | 85    | M0      | Q548L2_HUMAN (Q548L2) CTCL tumor antigen HD-CL-06 (Vimentin variant)                                                                                                                                                                                           |
| Ss1.1-Tra1-TCH01H020010.5   | 0.9182  | 85    | M2      | Q510W0_MOUSE (Q510W0) Atp5f1 protein                                                                                                                                                                                                                           |
| Ss1.1-rnca08b_d7.5          | 0.7617  | 85    | M2      | CHCH2_HUMAN (Q9Y6H1) Coiled-coil-helix-coiled-coil-helix domain containing protein 2 (HCV NS2 trans-regulated protein) (NS2TP)                                                                                                                                 |
| Ss1.1-reru34c_m15.5         | 1.1336  | 85    | M0      | Q58EA4_MOUSE (Q58EA4) Ribosomal protein L24                                                                                                                                                                                                                    |
| Ss1.1-rebs23c_c16.5         | 1.4328  | 85    | M0      | Q5BLJ7_MOUSE (Q5BLJ7) Ribosomal protein S13                                                                                                                                                                                                                    |
| Ss1.1-LyN1-MLN01F120059.5.5 | 1.4882  | 85    | M0      | Q95LX4_MACFA (Q95LX4) Hypothetical protein                                                                                                                                                                                                                     |
| Ss1.1-Tra1-TCH01B110046.5   | 0.9542  | 84    | M0      | ATPB_BOVIN (P00829) ATP synthase beta chain, mitochondrial precursor (EC 3.6.3.14)                                                                                                                                                                             |
| Ss1.1-rpldo0136_n6.5        | 0.6539  | 84    | M0      | Q5E9A3_BOVIN (Q5E9A3) Poly(RC) binding protein 1                                                                                                                                                                                                               |
| Ss1.1-rpgl03_d11.5          | 0.7218  | 84    | M0      | Q5U3Y8_RAT (Q5U3Y8) Basic transcription factor 3 (Predicted)                                                                                                                                                                                                   |
| Ss1.1-rjca33c_n9.5          | 1.3651  | 84    | M0      | Q5XJF6_MOUSE (Q5XJF6) Ribosomal protein L10A                                                                                                                                                                                                                   |
| Ss1.1-rjca20c_e21.5.5       | 1.7946  | 84    | M0      | Q542K7_MOUSE (Q542K7) 2 days neonate thymus thymic cells cDNA, RIKEN full-length enriched library, clone:E430003K16 product:unclassifiable, full insert sequence (2 days neonate thymus thymic cells cDNA, RIKEN full-length enriched library, clone:C920005B2 |
| Ss1.1-rfat0107_a23.5        | 1.3492  | 84    | M0      | Q6QAS5_PIG (Q6QAS5) 60S ribosomal protein L12 (Fragment)                                                                                                                                                                                                       |
| Ss1.1-recc2833c_n13.5.5     | 1.1404  | 84    | M0      | Q13765_HUMAN (Q13765) Nascent polypeptide associated complex alpha subunit (Alpha NAC) (NAC alpha) (NACA protein)                                                                                                                                              |
| Ss1.1-rnmb24b_j1.5          | 0.9093  | 83    | M0      | Q5R556_PONPY (Q5R556) Hypothetical protein DKFZp459G1118 (Hypothetical protein DKFZp459K1710)                                                                                                                                                                  |
| Ss1.1-rnmb15b_p14.5         | 1.8502  | 83    | M0      | Q58DT1_BOVIN (Q58DT1) Ribosomal protein L7                                                                                                                                                                                                                     |
| Ss1.1-rmed17c_f9.5          | 1.1102  | 83    | M0      | Q53ZT4_PIG (Q53ZT4) Peptidyl-prolyl cis-trans isomerase A                                                                                                                                                                                                      |
| Ss1.1-rese40c_e16.5.5       | 2.1359  | 83    | M0      | Q7M2Y2_BOVIN (Q7M2Y2) Tumor-specific transplantation antigen P198 homolog p23 (Fragment)                                                                                                                                                                       |
| Ss1.1-LyN1-MLN01H080026.5.5 | 1.1617  | 83    | M2      | Q7Z7N7_HUMAN (Q7Z7N7) SLC25A3 protein (Fragment)                                                                                                                                                                                                               |
| Ss1.1-rmgp001_l24.5         | 1.1443  | 82    | M2      | Q53YE6_HUMAN (Q53YE6) Insulin-like growth factor binding protein 7                                                                                                                                                                                             |
| Ss1.1-rmas932b_l11.5        | 3.3590  | 82    | M0      | Q56K14_BOVIN (Q56K14) Ribosomal protein P1 isoform 1-like                                                                                                                                                                                                      |
| Ss1.1-rrej02b_k17.5         | 2.4719  | 82    | M0      | Q56K03_BOVIN (Q56K03) Ribosomal protein L27a-like                                                                                                                                                                                                              |
| Ss1.1-reje08b_h24.5         | 2.0149  | 82    | M0      | Q57Z92_HUMAN (Q57Z92) Hypothetical protein RPS7                                                                                                                                                                                                                |
| Ss1.1-recc2803c_e10.5.5     | 0.7475  | 82    | M0      | Q517C3_HUMAN (Q517C3) High-mobility group box 1                                                                                                                                                                                                                |
| Ss1.1-recc2802c_c11.5       | 1.1792  | 82    | M0      | Q58EA6_MOUSE (Q58EA6) Ribosomal protein S25 (Hypothetical protein)                                                                                                                                                                                             |
| Ss1.1-LyN1-MLN01B030076.5   | 0.5965  | 82    | M0      | B11_PIG (Q66RM2) Bax inhibitor-1 (BI-1) (Testis enhanced gene transcript)                                                                                                                                                                                      |
| Ss1.1-Utr1-UTR01B070092.5.5 | 0.9914  | 81    | M0      | Q5FVF0_HUMAN (Q5FVF0) Nuclease sensitive element binding protein 1                                                                                                                                                                                             |
| Ss1.1-rmed02c_l19.5         | 1.9613  | 81    | M0      | RS16_RAT (P62250) 40S ribosomal protein S16                                                                                                                                                                                                                    |
| Ss1.1-reje02b_b12.5         | 0.8470  | 81    | M0      | SODC_PIG (P04178) Superoxide dismutase [Cu-Zn] (EC 1.15.1.1)                                                                                                                                                                                                   |
| Ss1.1-rduo434b_e14.5.5      | 0.7004  | 81    | M0      | Q91ZR9_MOUSE (Q91ZR9) Heterogeneous nuclear ribonucleoprotein A2/B1                                                                                                                                                                                            |
| Ss1.1-LyN1-MLN01D010060.5   | 0.7667  | 81    | M0      | Q56JZ5_BOVIN (Q56JZ5) Eukaryotic translation initiation factor 3 subunit 3 gamma                                                                                                                                                                               |
| Ss1.1-Lng1-LNG010027C01.5   | 0.7831  | 81    | M0      | ATPA1_BOVIN (P19483) ATP synthase alpha chain heart isoform, mitochondrial precursor (EC 3.6.3.14)                                                                                                                                                             |

## 6 cDNA library specific genes

**Table S3:** Top 50 of the tissue specific gene candidates, when ignoring the two contigs (Ss1.1-rcmu33\_m2.5,Ss1.1-rssp31\_a10.5) not having a unigene match at all as well as the read Ss1.1-rck\_0162.5 which most likely seems to be a rice contaminated read. The complete list consist of 1002 candidates and is available online via <http://pigest.kvl.dk/download>. The column "SD sequence name" indicates the sequence name of the gene-cluster and the label in paranthesis indicates whether a similar expression pattern was found (+) not found (-) or not available (?) in the Unigene resource. The column "Lib" the library, "E-level" the (row) unnormalized expression ( $\times 1000$ ). The columns with "(2)" indicates the same information for the second most expressed library. "None" for Lib(2) means that there are no other libraries with expression and the #R(2) value is sat "-1". The column "M-level" is the match level to uniprot and "Description" is the description form the matching sequence in uniprot. The column "UG" indicates if similar expression pattern was found in UniGene ('+'), nor found ('-'), not enough data to decide ('?').

| SD sequence name              | Lib | E-level  | #R   | Lib(2) | E-level(2) | #R(2) | P-val        | M-level | Description                                                                                                                                                                                                                                                                                         | UG |
|-------------------------------|-----|----------|------|--------|------------|-------|--------------|---------|-----------------------------------------------------------------------------------------------------------------------------------------------------------------------------------------------------------------------------------------------------------------------------------------------------|----|
| Ss1.1-rsag001_a21.5           | sag | 189.4756 | 1037 | pty    | 1.9980     | 14    | 0.00000e+00  | M5      | Q8HY86_BOVIN (Q8HY86) Statherin                                                                                                                                                                                                                                                                     | +  |
| Ss1.1-rpro31_i2.5             | pro | 246.7998 | 482  | tes    | 5.8188     | 28    | 1.76784e-219 | M0      | MSMB_PIG (O02826) Beta-microseminoprotein precursor (Prostate secreted seminal plasma protein) (Prostate secretory protein PSP94) (PSP-94) (TS507)                                                                                                                                                  | +  |
| Ss1.1-rnmm34c_i5.5            | nmm | 115.0066 | 866  | cmu    | 1.8639     | 10    | 3.02209e-184 | M0      | Q8WMH1_PIG (Q8WMH1) Odorant binding protein                                                                                                                                                                                                                                                         | +  |
| Ss1.1-rfli704b_i16.5.5        | fli | 199.8377 | 985  | eli    | 37.0427    | 244   | 7.50800e-159 | M0      | Q29014_PIG (Q29014) Alpha-1 acid glycoprotein (Fragment)                                                                                                                                                                                                                                            | +  |
| Ss1.1-Liv1-LVR010068E11.5.5   | lun | 125.0564 | 831  | cli    | 12.2249    | 80    | 2.01617e-156 | M0      | ALBU_PIG (P08835) Serum albumin precursor                                                                                                                                                                                                                                                           | -  |
| Ss1.1-rcst21_i12.5            | cst | 99.7059  | 712  | sto    | 5.9342     | 33    | 2.30008e-133 | M3      | Q9GMY3_RHIFE (Q9GMY3) Pepsinogen C                                                                                                                                                                                                                                                                  | +  |
| Ss1.1-rcmu33_m2.5             | cmu | 60.2050  | 323  | nmm    | 0.9296     | 7     | 7.37968e-112 |         |                                                                                                                                                                                                                                                                                                     | ?  |
| Ss1.1-Tra1-TCH01F090076.5     | pty | 64.7924  | 454  | nmm    | 4.3825     | 33    | 4.28277e-103 | M0      | Q5XW65_PIG (Q5XW65) Lung and nasal epithelium carcinoma associated protein precursor                                                                                                                                                                                                                | +  |
| Ss1.1-rduo424b_g21.5          | duo | 69.1204  | 400  | cje    | 3.9656     | 24    | 2.12099e-93  | M0      | S100G_PIG (P02632) Vitamin D-dependent calcium-binding protein, intestinal (CABP) (Calbindin D9K)                                                                                                                                                                                                   | +  |
| Ss1.1-rpgl01_k14.5            | pgl | 112.3223 | 948  | None   | 0.0000     | -1    | 1.62870e-86  | M0      | GLHA_PIG (P01219) Glycoprotein hormones alpha chain precursor (Follitropin alpha chain) (Follicle-stimulating hormone alpha chain) (FSH-alpha) (Lutropin alpha chain) (Luteinizing hormone alpha chain) (LSH-alpha) (Thyrotropin alpha chain) (Thyroid-stimulating hormone alpha chain) (TSH-alpha) | ?  |
| Ss1.1-rnca15b_h14.5           | nca | 43.2521  | 316  | nmm    | 1.8592     | 14    | 3.57334e-78  | M5      | O77753_CANFA (O77753) Type IIA procollagen                                                                                                                                                                                                                                                          | +  |
| Ss1.1-LyN1-MLN01E050012.5     | ute | 39.5698  | 298  | nmm    | 1.4608     | 11    | 2.50727e-74  | M0      | PPA5_PIG (P09889) Tartrate-resistant acid phosphatase type 5 precursor (EC 3.1.3.2) (TR- AP) (Tartrate-resistant acid ATPase) (TrATPase) (Acid phosphatase 5, tartrate resistant) (Uteroferrin) (UF)                                                                                                | ?  |
| Ss1.1-Mixn-0007g14.5          | ton | 37.9080  | 216  | eep    | 2.2062     | 18    | 4.54147e-62  | M3      | Q6AZK5_HUMAN (Q6AZK5) KRT13 protein (Fragment)                                                                                                                                                                                                                                                      | +  |
| Ss1.1-Liv1-LVR010082F10.5     | lun | 35.6659  | 237  | eli    | 1.6700     | 11    | 1.30236e-56  | M2      | FIBB_BOVIN (P02676) Fibrinogen beta chain precursor [Contains: Fibrinopeptide B]                                                                                                                                                                                                                    | -  |
| Ss1.1-rylg03_k7.5.5           | lyg | 100.3594 | 754  | pty    | 35.1077    | 246   | 7.41299e-54  | M0      | Q863D3_PIG (Q863D3) Pheromaxin A subunit precursor                                                                                                                                                                                                                                                  | -  |
| Ss1.1-rcje20_p13.5            | cje | 64.6067  | 391  | duo    | 12.0961    | 70    | 9.69001e-53  | M0      | FABPL_PIG (P49924) Fatty acid-binding protein, liver (L-FABP)                                                                                                                                                                                                                                       | -  |
| Ss1.1-rylg07_i20.5            | lyg | 38.3336  | 288  | pty    | 4.4241     | 31    | 3.47117e-50  | M5      | STAT_HUMAN (P02808) Statherin precursor                                                                                                                                                                                                                                                             | ?  |
| Ss1.1-rnca31b_e11.5.5         | ski | 96.5517  | 658  | fat    | 33.6134    | 228   | 2.17113e-49  | M1      | CO1A2_CANFA (O46392) Collagen alpha 2(I) chain precursor                                                                                                                                                                                                                                            | +  |
| Ss1.1-Pig4-TMW8025O13.3       | eye | 21.8244  | 128  | ret    | 0.1287     | 1     | 4.07931e-46  | M0      | Q95KK5_RABIT (Q95KK5) Beta A1-crystallin                                                                                                                                                                                                                                                            | +  |
| Ss1.1-Mixn-0025a16.5          | pro | 34.8182  | 68   | fat    | 0.1474     | 1     | 6.86818e-44  | M5      | Q6UW28_HUMAN (Q6UW28) HRPE773                                                                                                                                                                                                                                                                       | -  |
| Ss1.1-rpigca0_007150.5        | clu | 23.8095  | 199  | fty    | 0.3517     | 2     | 2.71671e-42  | M4      | AOAH_HUMAN (P28039) Acyloxyacyl hydrolase precursor (EC 3.1.1.77)                                                                                                                                                                                                                                   | -  |
| Ss1.1-rton1207b_j1.5          | ton | 24.2190  | 138  | eye    | 0.1705     | 1     | 1.33915e-41  | M4      | Q5T527_HUMAN (Q5T527) Small proline-rich protein 1A                                                                                                                                                                                                                                                 | +  |
| Ss1.1-rnca05b_c15.5.5         | ute | 28.2831  | 213  | spc    | 3.6277     | 32    | 3.00754e-41  | M0      | OSTP_PIG (P14287) Osteopontin precursor (Bone sialoprotein 1) (Secreted phosphoprotein 1) (SPP-1)                                                                                                                                                                                                   | -  |
| Ss1.1-rylg29_p4.5             | lyg | 29.8150  | 224  | pty    | 3.1397     | 22    | 6.07476e-41  | M4      | Q6P7U5_MOUSE (Q6P7U5) Muc19 protein (Fragment)                                                                                                                                                                                                                                                      | ?  |
| Ss1.1-rcst01_i10.5.5          | sto | 91.8899  | 511  | cst    | 35.5692    | 254   | 2.90498e-38  | M0      | GKN1_PIG (Q8HYA9) Gastrogline 1 precursor (18 kDa antrum mucosa protein) (AMP-18)                                                                                                                                                                                                                   | +  |
| Ss1.1-rpgl22_i13.5.5          | pgl | 47.3934  | 400  | None   | 0.0000     | -1    | 5.62612e-37  | M0      | PRL_PIG (P01238) Prolactin precursor (PRL)                                                                                                                                                                                                                                                          | +  |
| Ss1.1-rpty604b_o4.5           | pty | 31.9680  | 224  | nmm    | 5.0465     | 38    | 6.07771e-37  | M5      | Q98988_SALFO (Q98988) Ovulatory protein-2 precursor                                                                                                                                                                                                                                                 | -  |
| Ss1.1-rpigca0_009159.5.5      | clu | 31.3472  | 262  | liv    | 4.9737     | 34    | 4.33793e-36  | M0      | Q811L7_MOUSE (Q811L7) Heterogeneous nuclear ribonucleoprotein H1                                                                                                                                                                                                                                    | -  |
| Ss1.1-rnmm37c_n3.5            | nmm | 23.9044  | 180  | pty    | 2.1407     | 15    | 3.40377e-35  | M0      | Q866S8_PIG (Q866S8) Von Ebner gland protein                                                                                                                                                                                                                                                         | +  |
| Ss1.1-rill310b_f20.5          | ill | 24.0562  | 137  | fty    | 0.8792     | 5     | 4.41206e-35  | M0      | ILBP_PIG (P10289) Gastrotropin (GT) (ileal lipid-binding protein) (ILBP) (Porcine ileal peptide) (PIP)                                                                                                                                                                                              | +  |
| Ss1.1-Utr2-C0001810_J21.5     | ute | 43.6861  | 329  | cut    | 9.6856     | 57    | 6.08418e-35  | M1      | UFAP2_PIG (P46202) Uteroferrin-associated basic protein 2 precursor (UABP-2)                                                                                                                                                                                                                        | +  |
| Ss1.1-Liv1-LVR010066B06.5     | cli | 40.9535  | 268  | lun    | 8.7284     | 58    | 8.09752e-35  | M0      | HPT_PIG (Q8SPS7) Haptoglobin precursor                                                                                                                                                                                                                                                              | +  |
| Ss1.1-Tra1-TCH01E080083.5.120 | cov | 31.4524  | 238  | cki    | 4.6266     | 28    | 8.16804e-34  | M0      | Q6UJZ1_PIG (Q6UJZ1) Glutathione peroxidase 3 (Fragment)                                                                                                                                                                                                                                             | -  |
| Ss1.1-rsag04_g11.5            | sag | 19.0024  | 104  | pty    | 0.4281     | 3     | 9.05359e-34  | M4      | Q6P5S2_HUMAN (Q6P5S2) Hypothetical LOC389429 (Chromosome 6 open reading frame 58)                                                                                                                                                                                                                   | ?  |
| Ss1.1-rck0162.5               | ckk | 41.3793  | 294  | None   | 0.0000     | -1    | 7.70674e-32  | M4      | Q84XR3_HORSP (Q84XR3) Truncated alcohol dehydrogenase                                                                                                                                                                                                                                               | ?  |
| Ss1.1-rute2121b_i1.5.5        | ute | 19.7849  | 149  | cut    | 0.8496     | 5     | 2.66072e-31  | M5      | Q28388_HORSE (Q28388) P19 lipocalin                                                                                                                                                                                                                                                                 | ?  |
| Ss1.1-Liv1-LVR010061D12.5     | lun | 26.0346  | 173  | fli    | 1.8259     | 9     | 2.66125e-31  | M3      | FIBG_HUMAN (P02679) Fibrinogen gamma chain precursor                                                                                                                                                                                                                                                | -  |
| Ss1.1-rcst01_n6.5             | cst | 33.3287  | 238  | sto    | 5.5745     | 31    | 5.35977e-31  | M0      | Q29080_PIG (Q29080) Pepsinogen A precursor                                                                                                                                                                                                                                                          | +  |
| Ss1.1-Liv1-LVR010001B06.5     | cli | 19.5599  | 128  | clu    | 2.0340     | 17    | 2.47899e-29  | M3      | Q9GKP1_PIG (Q9GKP1) Complement component C3 (Complement C3)                                                                                                                                                                                                                                         | +  |
| Ss1.1-rfat0140_a13.5          | fat | 26.6844  | 181  | ski    | 5.1357     | 35    | 8.95358e-26  | M0      | FABPA_PIG (O97788) Fatty acid-binding protein, adipocyte (AFABP) (Adipocyte lipid-binding protein) (ALBP) (A-FABP) (AP2)                                                                                                                                                                            | +  |
| Ss1.1-Utr2-C0001801_G11.5.5   | ute | 11.5523  | 87   | eep    | 0.2451     | 2     | 9.39906e-26  | M0      | Q7YQE5_PIG (Q7YQE5) Placenta expressed transcript protein                                                                                                                                                                                                                                           | +  |
| Ss1.1-rck27_i4.5              | ckk | 16.0450  | 114  | nep    | 0.5518     | 3     | 8.78731e-25  | M5      | Q67V03_ORYSA (Q67V03) Hexose transporter-like protein                                                                                                                                                                                                                                               | ?  |
| Ss1.1-rcga37b_b23.5           | cga | 20.0949  | 72   | mgp    | 0.2307     | 1     | 2.90257e-24  | M0      | WAP_PIG (O46655) Whey acidic protein precursor (WAP)                                                                                                                                                                                                                                                | ?  |
| Ss1.1-Liv1-LVR010021H02.5     | ute | 14.7391  | 111  | clu    | 1.4358     | 12    | 3.12333e-24  | M3      | Q5R5T2_PONPY (Q5R5T2) Hypothetical protein DK-FzP459H066                                                                                                                                                                                                                                            | ?  |
| Ss1.1-rmga10_g19.5            | cga | 27.3514  | 98   | mga    | 4.0051     | 25    | 4.20456e-23  | M0      | LALBA_PIG (P18137) Alpha-lactalbumin precursor (Lactose synthase B protein)                                                                                                                                                                                                                         | ?  |
| Ss1.1-reli1114b_h24.5         | eli | 72.7190  | 479  | fli    | 31.4465    | 155   | 1.34889e-22  | M0      | A1AT_PIG (P50447) Alpha-1-antitrypsin precursor (Alpha-1 protease inhibitor) (Alpha-1- antiproteinase)                                                                                                                                                                                              | +  |
| Ss1.1-rssp31_a10.5            | fat | 17.1016  | 116  | ski    | 1.9076     | 13    | 1.35371e-22  |         |                                                                                                                                                                                                                                                                                                     | ?  |
| Ss1.1-rfat0138_i21.5.5        | fat | 20.1976  | 137  | ski    | 3.2282     | 22    | 2.72230e-22  | M5      | Q9H354_HUMAN (Q9H354) PRO1933                                                                                                                                                                                                                                                                       | ?  |
| Ss1.1-rnlu1830b_g11.5         | nlu | 24.9185  | 130  | elu    | 1.1561     | 3     | 1.50643e-19  | M0      | PSPC_PIG (P15785) Pulmonary surfactant-associated protein C (SP-C) (Pulmonary surfactant-associated proteolipid SPL (Val))                                                                                                                                                                          | +  |
| Ss1.1-rton1228b_k22.5         | ton | 13.5135  | 77   | nep    | 0.5518     | 3     | 1.92833e-19  | M2      | K2C6A_HUMAN (P02538) Keratin, type II cytoskeletal 6A (Cytokeratin 6A) (CK 6A) (K6a keratin)                                                                                                                                                                                                        | +  |



## 7 Accession numbers

**Table S4:** The merged ranges of the accession numbers for the Sino-Danish ESTs sequences available under the center name SDJVP (Sino-Danish Joint Venture Project) at NCBI's trace archive, in the period of July 16 to July 31, 2006.

| Range | TI start   | TI end     |
|-------|------------|------------|
| 1     | 1372588356 | 1372588534 |
| 2     | 1373542512 | 1373550691 |
| 3     | 1373553740 | 1373554377 |
| 4     | 1374455571 | 1374455833 |
| 5     | 1374460033 | 1374477206 |
| 6     | 1374493724 | 1374496358 |
| 7     | 1374516358 | 1374530585 |
| 8     | 1374622420 | 1374630037 |
| 9     | 1374647814 | 1374672203 |
| 10    | 1374759941 | 1374785708 |
| 11    | 1374788781 | 1374792215 |
| 12    | 1374813074 | 1374830446 |
| 13    | 1374872458 | 1374877824 |
| 14    | 1374882145 | 1374890244 |
| 15    | 1374912158 | 1374922748 |
| 16    | 1374929853 | 1374934617 |
| 17    | 1375363597 | 1375379964 |
| 18    | 1375407255 | 1375418471 |
| 19    | 1376790949 | 1376807986 |
| 20    | 1376876515 | 1376892947 |
| 21    | 1376933435 | 1376950392 |
| 22    | 1376998303 | 1377016954 |
| 23    | 1377102633 | 1377117523 |
| 24    | 1377189604 | 1377206265 |
| 25    | 1377253980 | 1377272493 |
| 26    | 1377299975 | 1377317340 |
| 27    | 1377325201 | 1377338507 |
| 28    | 1377343692 | 1377358181 |
| 29    | 1377534935 | 1377539735 |
| 30    | 1377555096 | 1377573748 |
| 31    | 1377634710 | 1377642289 |
| 32    | 1377662532 | 1377672058 |
| 33    | 1377705896 | 1377724109 |
| 34    | 1377739944 | 1377787073 |
| 35    | 1377853725 | 1377869948 |
| 36    | 1377888668 | 1377906145 |
| 37    | 1377950861 | 1377968093 |
| 38    | 1377976734 | 1377994190 |
| 39    | 1379681547 | 1379694891 |
| 40    | 1379734210 | 1379750367 |
| 41    | 1379767659 | 1379783424 |
| 42    | 1379785709 | 1379801707 |
| 43    | 1379917493 | 1379961465 |
| 44    | 1380064442 | 1380080379 |
| 45    | 1380101383 | 1380117576 |
| 46    | 1380337508 | 1380377319 |
| 47    | 1380628018 | 1380639932 |
| 48    | 1380694786 | 1380697658 |
| 49    | 1380717658 | 1380731757 |
| 50    | 1380781374 | 1380823792 |
| 51    | 1380913793 | 1380922205 |
| 52    | 1380932206 | 1380949414 |
| 53    | 1380999415 | 1381017794 |
| 54    | 1381092978 | 1381108837 |
| 55    | 1381241046 | 1381256415 |
| 56    | 1381334730 | 1381347703 |
| 57    | 1381355288 | 1381362737 |
| 58    | 1382340999 | 1382343215 |
| 59    | 1382446420 | 1382465179 |
| 60    | 1382472780 | 1382491270 |
| 61    | 1382497855 | 1382513728 |
| 62    | 1382526627 | 1382543876 |
| 63    | 1382576521 | 1382580682 |
| 64    | 1382665335 | 1382677174 |
| 65    | 1382786748 | 1382799972 |
| 66    | 1382879973 | 1382881324 |
| 67    | 1382905125 | 1382906756 |
