# Supplementary material for: Porcine transcriptome analysis based on 97 non-normalized cDNA libraries and assembly of 1,021,891 expressed sequence tags
Source: PubMed Central journal article supplement (PMC1895994; doi:10.1186/gb-2007-8-4-r45), 2007-04-02

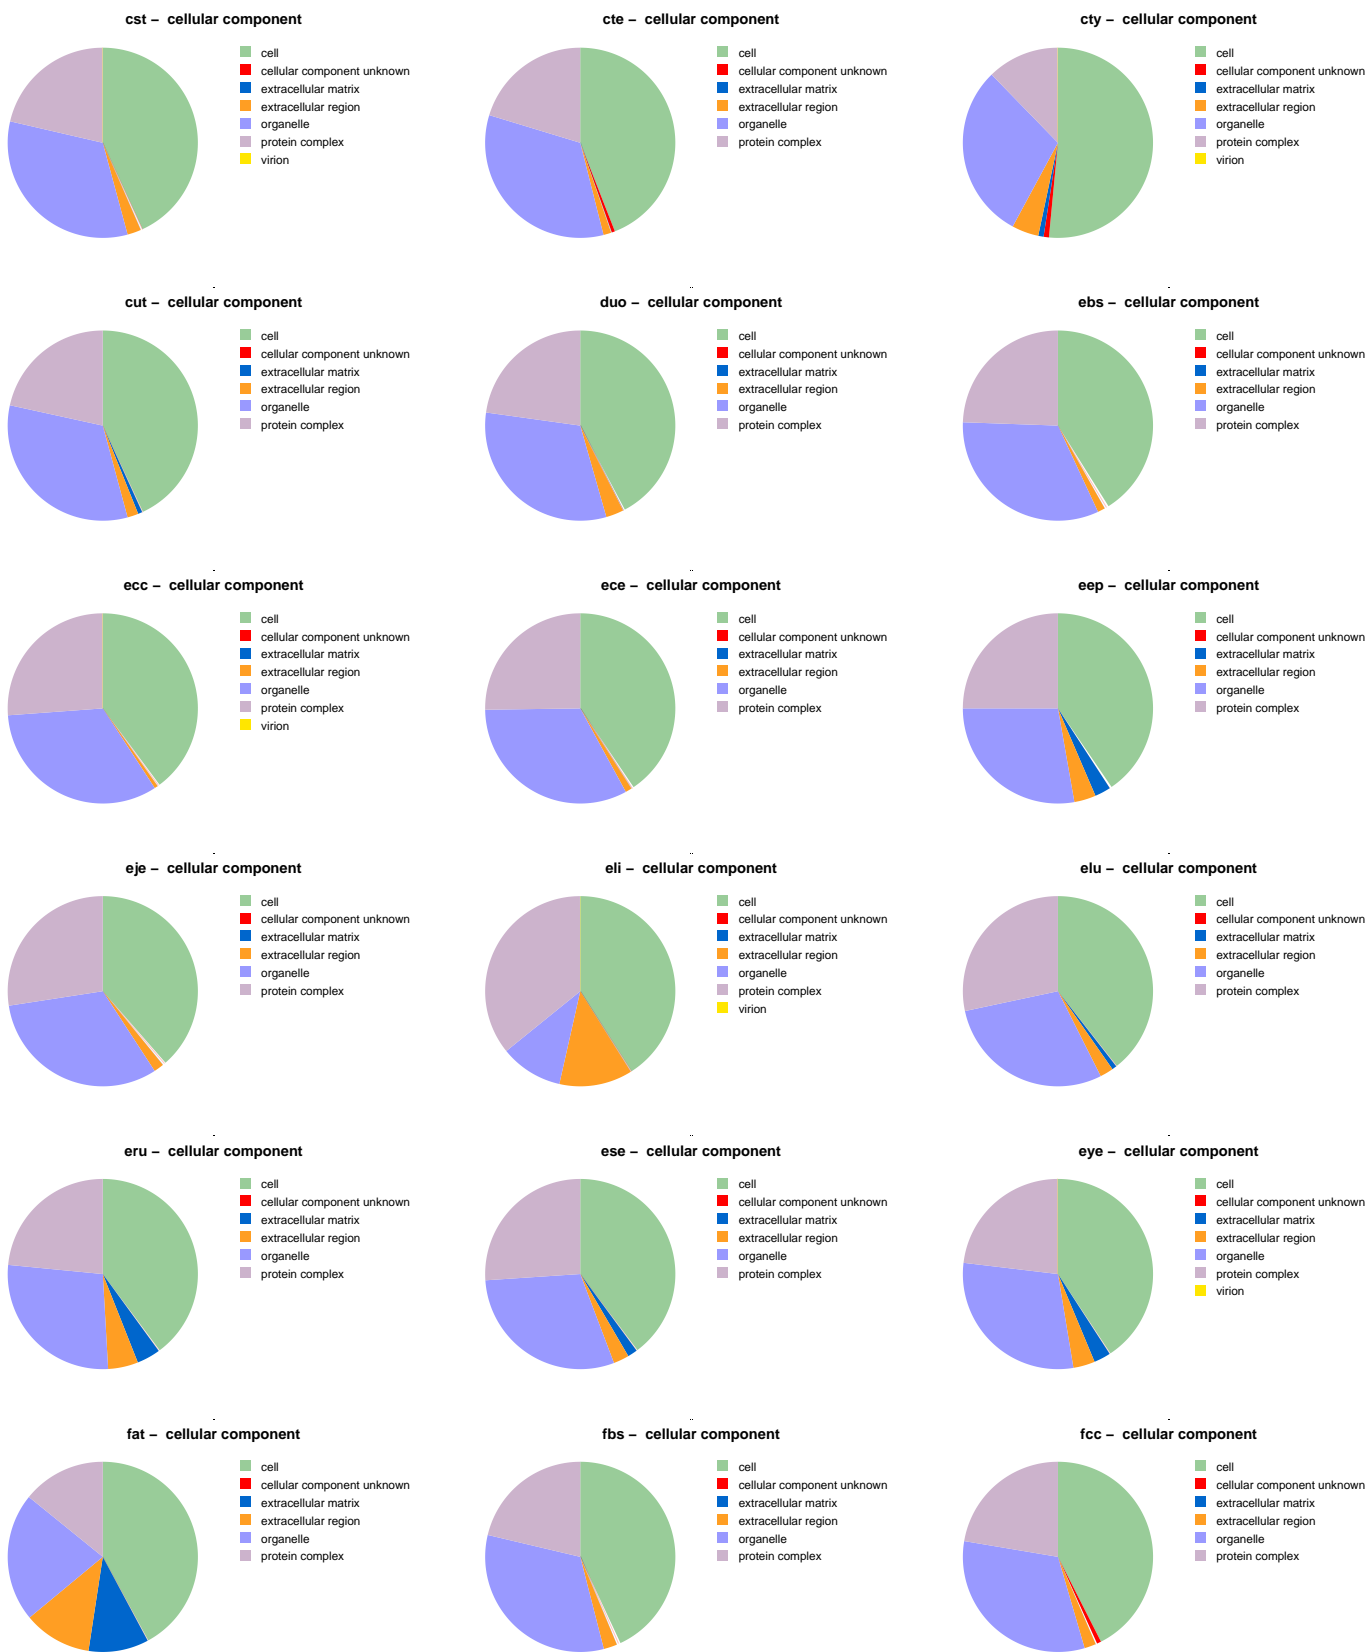

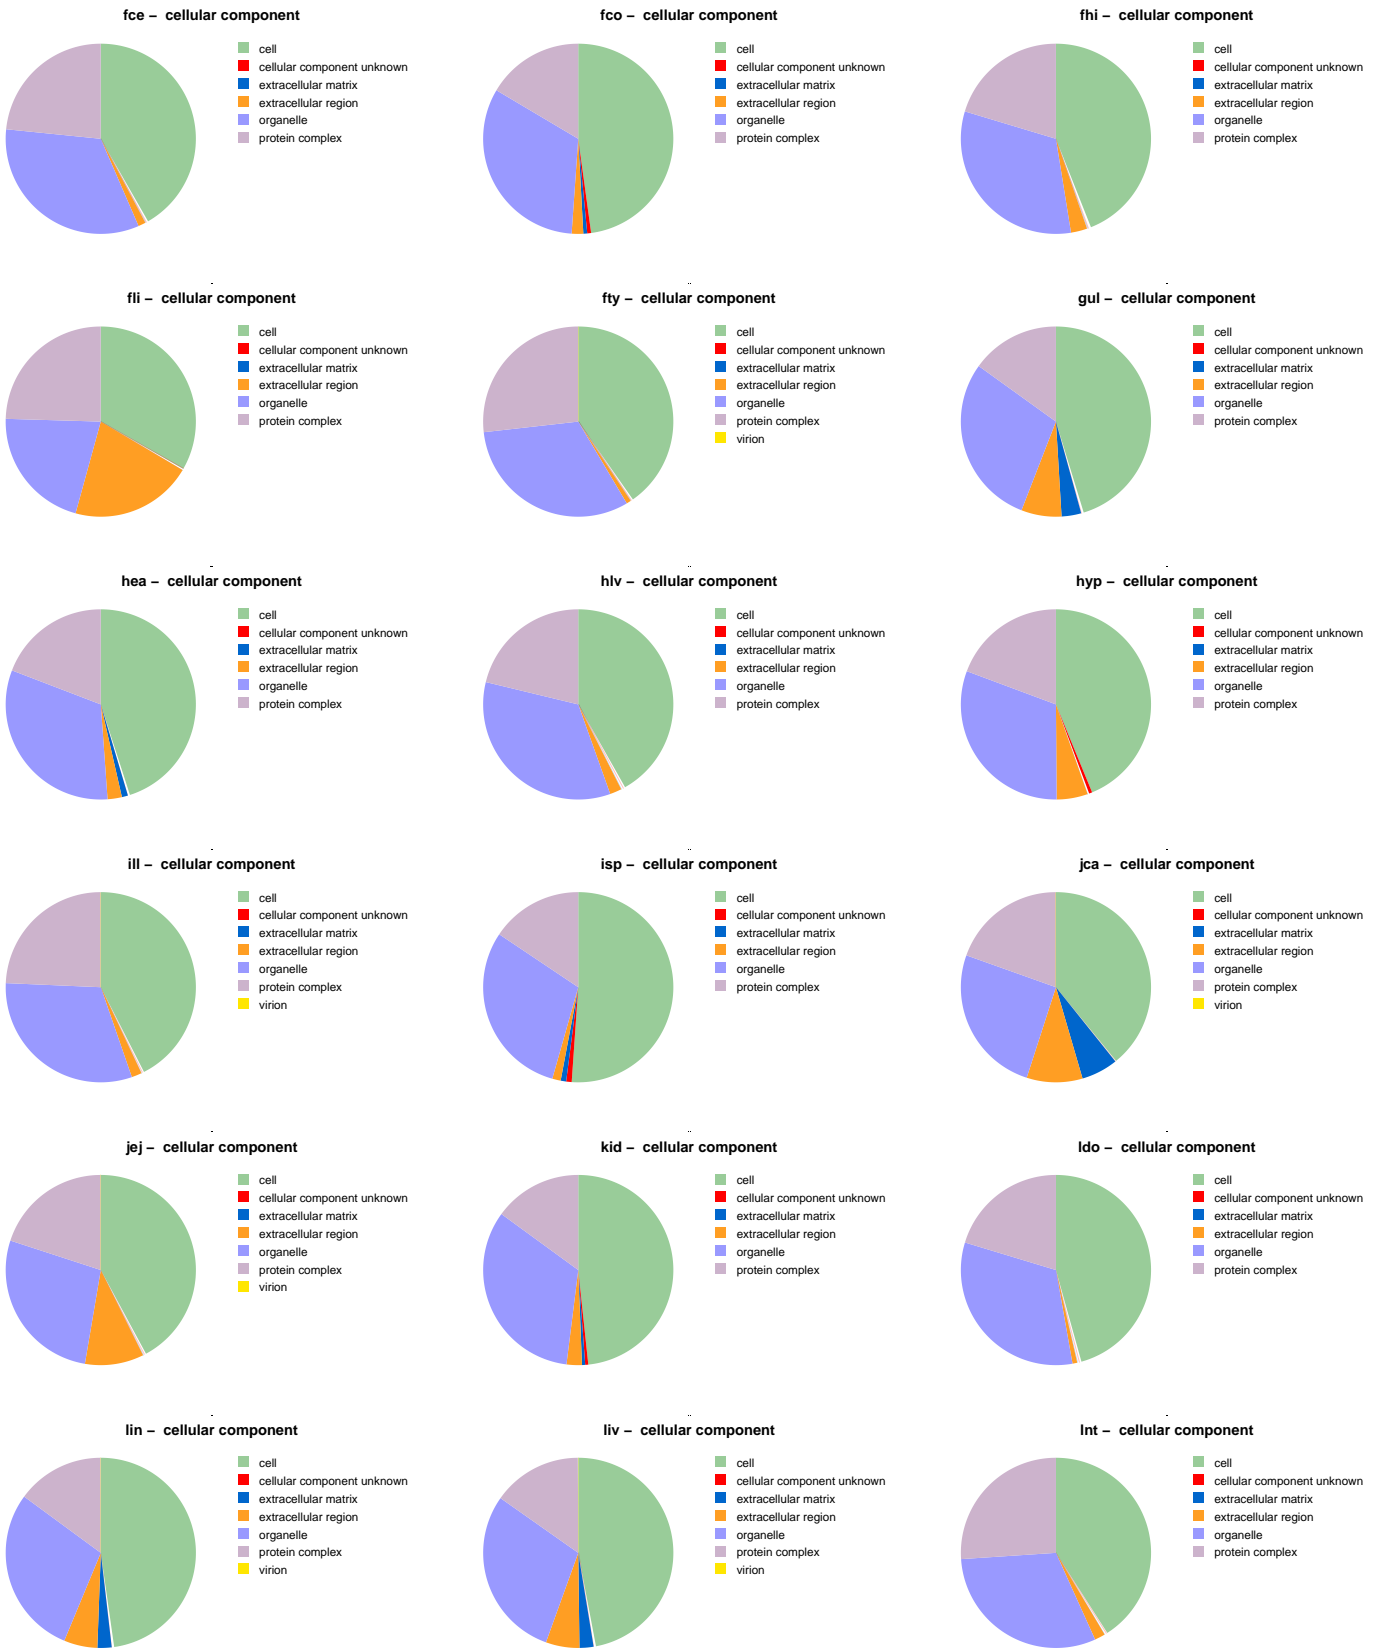

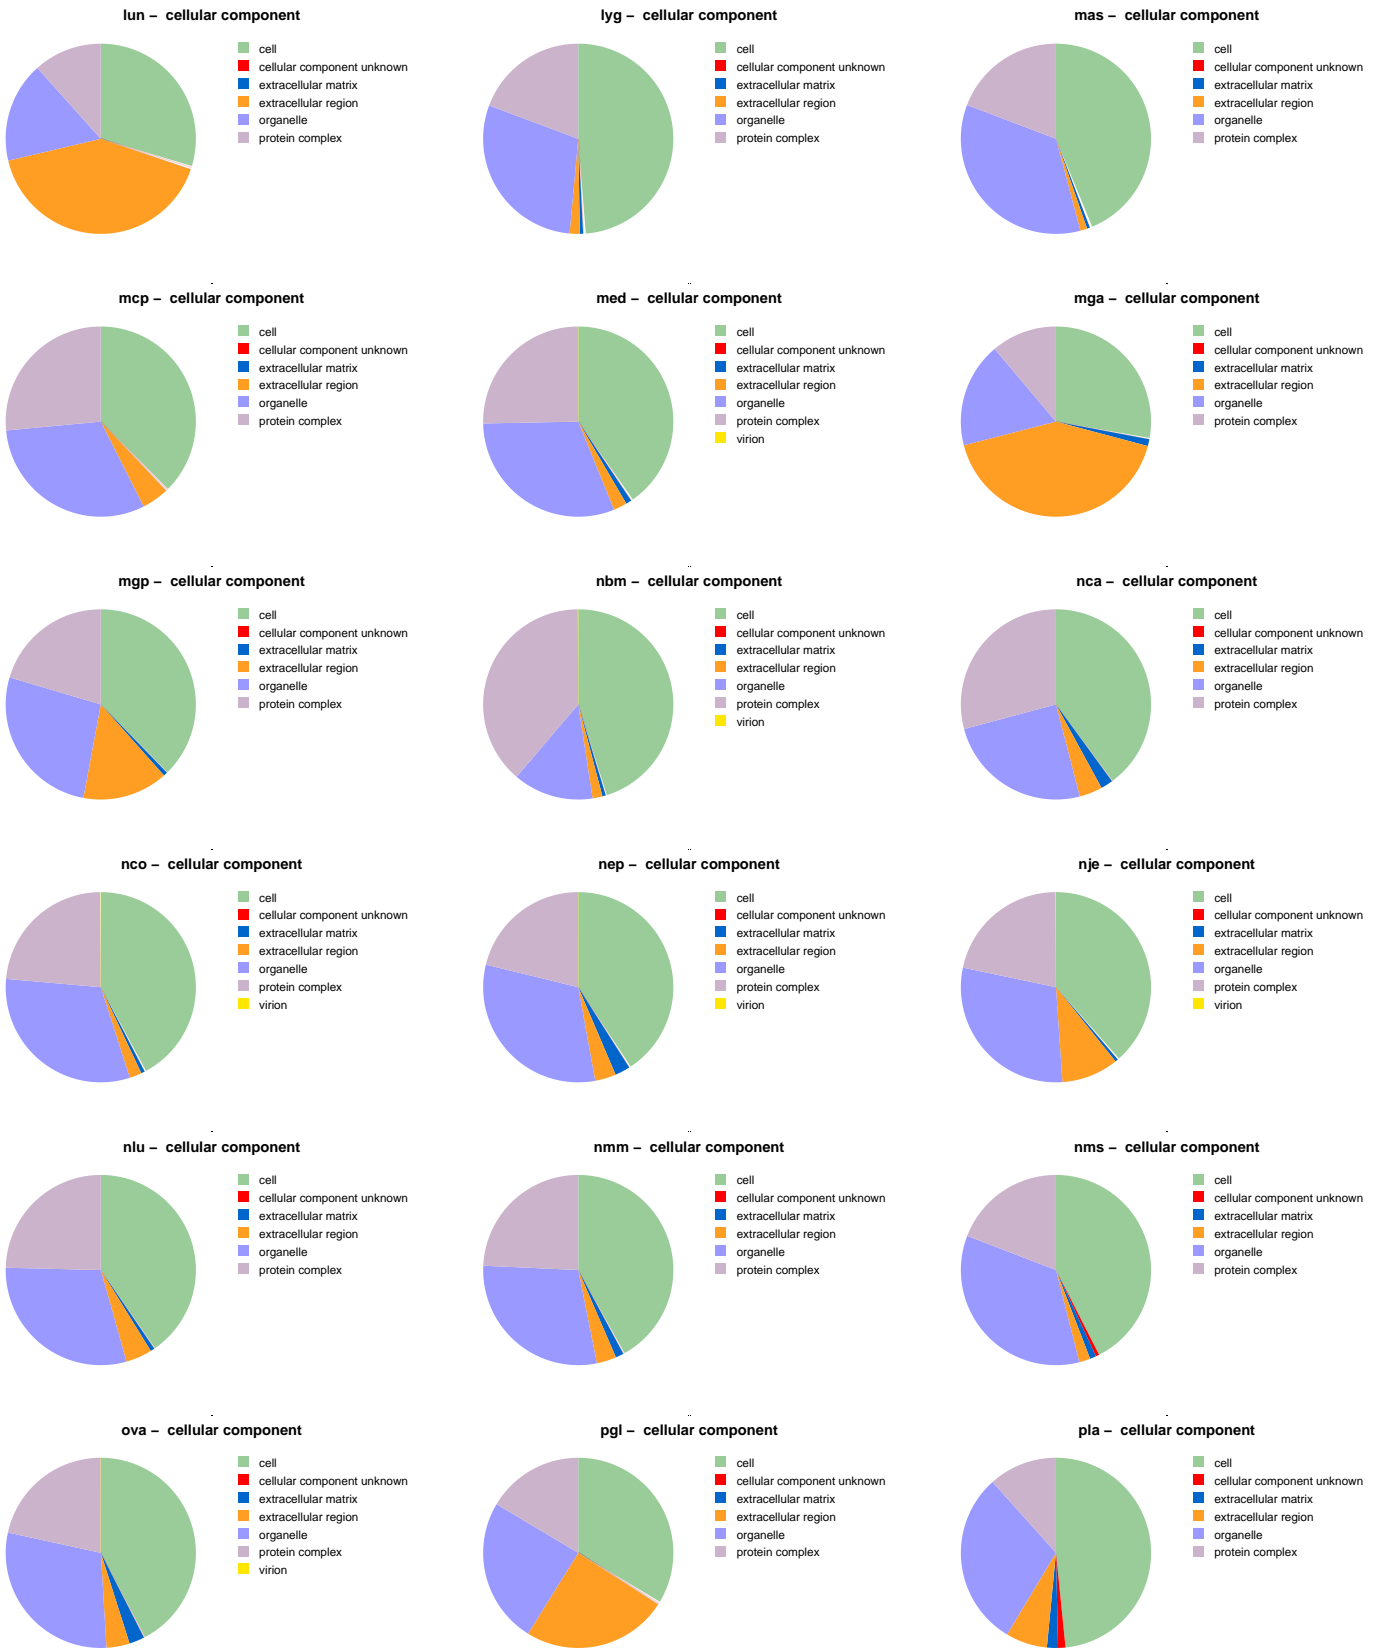

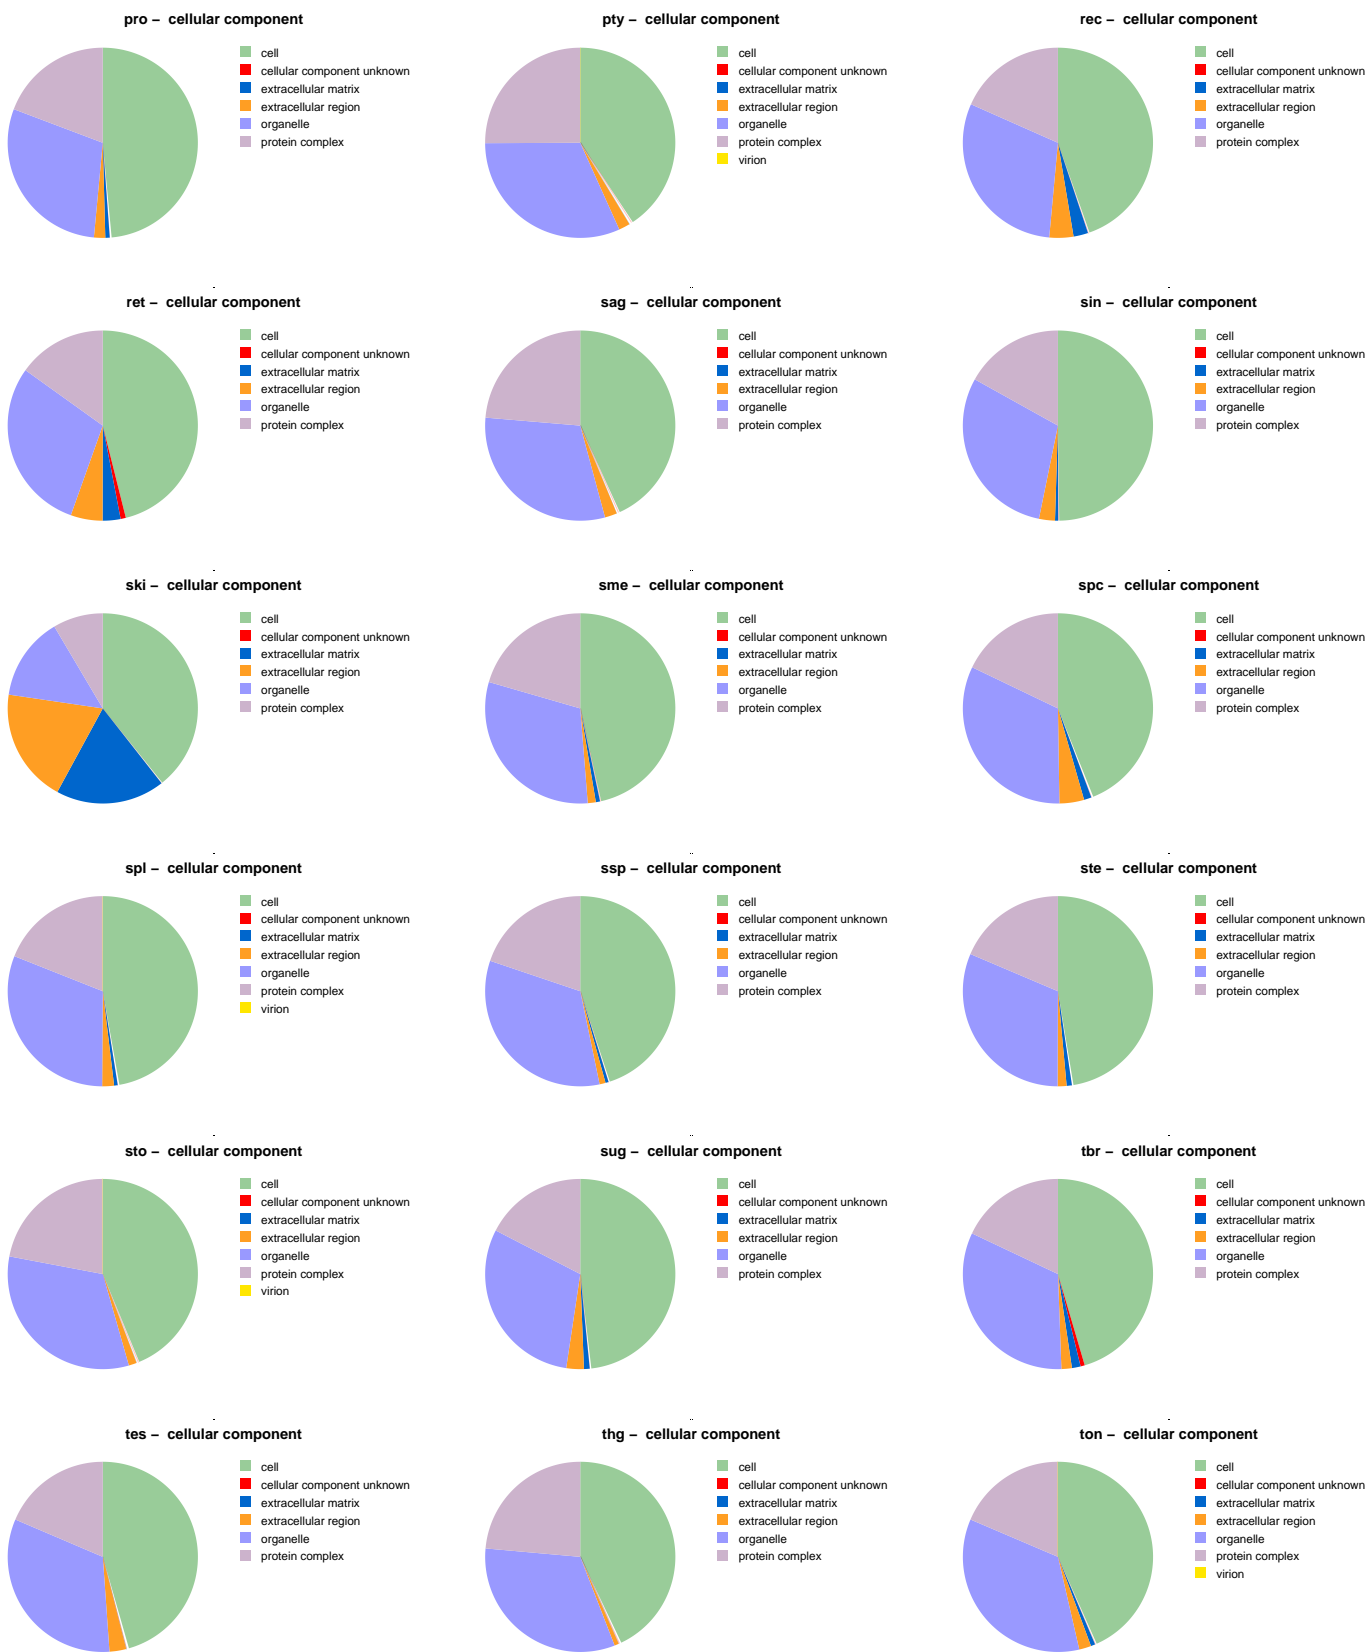

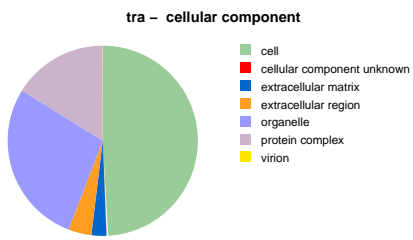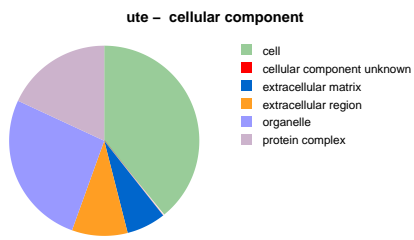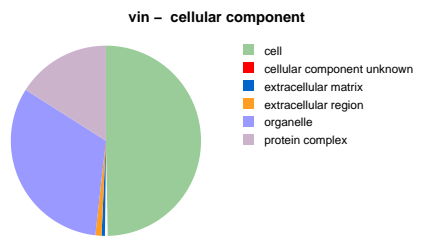

Supplement: gb-2007-8-4-r45-S3.pdf [file gb-2007-8-4-r45-S3.pdf]
